# Supplementary material
Source: publisher site journal article supplement (https://www.dovepress.com/article/478045)
Supplement: Supplementary file 1 [file get_supplementary_file.php]

**Supplementary Tables**

**Supplementary Table 1.** Repeated measure ANOVA comparison between surface microhardness, elemental analysis (calcium, phosphorus and fluoride weight percentage) at baseline, after demineralization, and after remineralization at all three time points for both EMD-agarose and n-HA-EMD-agarose hydrogels.

| Assessment method | Material | Duration  (days) | Difference of Levels (time×material) | F-Value | Adjusted p-value |
| --- | --- | --- | --- | --- | --- |
| Microhardness | EMD-agarose | 2 | Baseline | 4.23 | 0.004* |
| After demineralization |
| After remineralization |
| 4 | Baseline |
| After demineralization |
| After remineralization |
| 6 | Baseline |
| After demineralization |
| After remineralization |
| n-HA-EMD-agarose | 2 | Baseline | 3.15 | 0.019* |
| After demineralization |
| After remineralization |
| 4 | Baseline |
| After demineralization |
| After remineralization |
| 6 | Baseline |
| After demineralization |
| After remineralization |
| After remineralization |
| Calcium weight percentage | EMD-agarose | 2 | Baseline | 1.98 | 0.106 |
| After demineralization |
| After remineralization |
| 4 | Baseline |
| After demineralization |
| After remineralization |
| 6 | Baseline |
| After demineralization |
| After remineralization |
| n-HA-EMD-agarose | 2 | Baseline | 21.70 | 0.000* |
| After demineralization |
| After remineralization |
| 4 | Baseline |
| After demineralization |
| After remineralization |
| 6 | Baseline |
| After demineralization |
| After remineralization |
| Phosphorous weight percentage | EMD-agarose | 2 | Baseline | 11.89 | 0.000* |
| After demineralization |
| After remineralization |
| 4 | Baseline |
| After demineralization |
| After remineralization |
| 6 | Baseline |
| After demineralization |
| After remineralization |
| n-HA-EMD-agarose | 2 | Baseline | 27.93 | 0.000* |
| After demineralization |
| After remineralization |
| 4 | Baseline |
| After demineralization |
| After remineralization |
| 6 | Baseline |
| After demineralization |
| After remineralization |
| Fluoride weight percentage | EMD-agarose | 2 | Baseline | 60.65 | 0.000* |
| After demineralization |
| After remineralization |
| 4 | Baseline |
| After demineralization |
| After remineralization |
| 6 | Baseline |
| After demineralization |
| After remineralization |
| n-HA-EMD-agarose | 2 | Baseline | 121.22 | 0.000* |
| After demineralization |
| After remineralization |
| 4 | Baseline |
| After demineralization |
| After remineralization |
| 6 | Baseline |
| After demineralization |
| After remineralization |

Significance level p<0.05 repeated measures of two-way analysis of variance; *statistically significant; EMD, enamel matrix derivative; n-HA, nano-hydroxyapatite.

**Supplementary Table 2.** Descriptive statistics and comparison of calcium weight percentage between groups at baseline, after demineralization, and after remineralization.

| Assessment groups | Material | Duration  (days) | Mean±(SD) | Std. Error | Min | Max |  | Two-way ANOVA | | |
| --- | --- | --- | --- | --- | --- | --- | --- | --- | --- | --- |
| Time | Material | Material×time |
| At baseline | EMD-agarose | 2 | 42.817±(2.267) | 0.756 | 39.89 | 47.11 | p*-*value | 0.649 | 0.773 | 0.793 |
| 4 | 42.157±(1.35) | 0.450 | 40.27 | 43.78 |
| 6 | 43.257±(2.214) | 0.738 | 39.58 | 46.02 |
| n-HA-EMD-agarose | 2 | 43.002±(2.183) | 0.728 | 39.54 | 46.73 |
| 4 | 42.780±(1.981) | 0.660 | 40.50 | 46.98 |
| 6 | 42.938±(2.283) | 0.761 | 38.99 | 46.07 |
| After demineralization | EMD-agarose | 2 | 36.790±(1.371) | 0.457 | 34.57 | 38.28 | p-value | 0.079 | 0.940 | 0.720 |
| 4 | 37.233±(2.078) | 0.693 | 34.31 | 39.7 |
| 6 | 37.824±(1.121) | 0.374 | 35.99 | 39.74 |
| n-HA-EMD-agarose | 2 | 36.381±(2.0) | 0.667 | 33.45 | 39.12 |
| 4 | 37.667±(1.178) | 0.393 | 35.95 | 39.34 |
| 6 | 37.702±(1.46) | 0.489 | 34.99 | 39.78 |
| After remineralization | EMD-agarose | 2 | 36.637±(2.242)B | 0.747 | 33.45 | 39.34 | p-value | 0.000* | 0.000* | 0.000* |
| 4 | 38.933±(1.838)B | 0.613 | 36.89 | 42.36 |
| 6 | 39.713±(0.958)B | 0.319 | 38.51 | 41.08 |
| n-HA-EMD-agarose | 2 | 37.09±(1.79)B | 0.598 | 33.85 | 38.86 |
| 4 | 44.88±(3.55)A | 1.18 | 40.12 | 49.32 |
| 6 | 46.31±(2.78)A | 0.929 | 42.03 | 49.58 |

*Statistically significant (significance level p < 0.05), Material×time; interaction between material and time, means with different superscript letters (B, A) indicate a significant difference in multiple comparison tests (Tukey's post-hoc test), EMD; enamel matrix derivative, n-HA; nano-hydroxyapatite, SD; standard deviation.

**Supplementary Table 3.** Descriptive statistics and comparison of phosphorous weight percentage between groups at baseline, after demineralization, and after remineralization.

| Assessment groups | Material | Duration  (days) | Mean±(SD) | Min | Max |  | Two-way ANOVA | | |
| --- | --- | --- | --- | --- | --- | --- | --- | --- | --- |
| Time | Material | Material×time |
| At baseline | EMD-agarose | 2 | 20.18±(0.634) | 19.070 | 21.060 | p value | 0.824 | 0.862 | 0.423 |
| 4 | 20.24±(0.974) | 18.570 | 21.850 |
| 6 | 20.63±(0.808) | 19.270 | 21.620 |
| n-HA-EMD-agarose | 2 | 20.41±(0.79) | 19.090 | 21.860 |
| 4 | 20.48±(0.76) | 19.470 | 21.670 |
| 6 | 20.27±(0.65) | 19.380 | 21.590 |
| After demineralization | EMD-agarose | 2 | 17.17±(1.09) | 15.63 | 18.68 | p value | 0.351 | 0.073 | 0.162 |
| 4 | 17.12±(1.042) | 15.04 | 18.26 |
| 6 | 18.23±(0.934) | 16.77 | 19.64 |
| n-HA-EMD-agarose | 2 | 18.06±(1.513) | 15.78 | 19.81 |
| 4 | 18.16±(1.096) | 16.28 | 19.78 |
| 6 | 17.96±(0.83) | 16.67 | 19.44 |
| After remineralization | EMD-agarose | 2 | 15.1±(1.673)D | 13.260 | 18.620 | p value | 0.000* | 0.000* | 0.028* |
| 4 | 18.45±(0.923)C | 17.050 | 19.890 |
| 6 | 19.64±(1.092)C | 17.940 | 21.910 |
| n-HA-EMD-agarose | 2 | 17.78±(0.961)C | 16.390 | 19.060 |
| 4 | 22.29±(2.352)B | 19.090 | 25.790 |
| 6 | 24.92±(0.826)A | 23.820 | 26.180 |

*Statistically significant (significance level p < 0.05), Material×time; interaction between material and time, means with different superscript letters (D, C, B, A) indicate a significant difference in multiple comparison tests (Tukey's post-hoc test), EMD; enamel matrix derivative, n-HA; nano-hydroxyapatite, SD; standard deviation.

**Supplementary Table 4.** Descriptive statistics and comparison of fluoride weight percentage between groups at baseline, after demineralization, and after remineralization.

| Assessment method | Material | Duration  (days) | Mean ± (SD) | Min | Max |  | Two-way ANOVA | | |
| --- | --- | --- | --- | --- | --- | --- | --- | --- | --- |
| Time | Material | Material×time |
| At baseline | EMD-agarose | 2 | 0.253±(0.088) | 0.12 | 0.35 | p value | 0.800 | 0.663 | 0.897 |
| 4 | 0.230±(0.0709) | 0.13 | 0.33 |
| 6 | 0.233±(0.0814) | 0.11 | 0.35 |
| n-HA-EMD-agarose | 2 | 0.25±(0.0504) | 0.17 | 0.31 |
| 4 | 0.25±(0.0656) | 0.17 | 0.36 |
| 6 | 0.24±(0.0658) | 0.15 | 0.35 |
| After demineralization | EMD-agarose | 2 | 0.194±(0.0534) | 0.13 | 0.28 | p value | 0.682 | 0.567 | 0.895 |
| 4 | 0.19±(0.0495) | 0.13 | 0.26 |
| 6 | 0.188±(0.0574) | 0.11 | 0.28 |
| n-HA-EMD-agarose | 2 | 0.21±(0.0535) | 0.14 | 0.29 |
| 4 | 0.19±(0.0428) | 0.14 | 0.26 |
| 6 | 0.19±(0.0381) | 0.13 | 0.24 |
| After remineralization | EMD-agarose | 2 | 0.1433±(0.0543)F | 0.07 | 0.23 | p value | 0.000* | 0.000* | 0.002* |
| 4 | 0.4422±(0.0429)**D** | 0.37 | 0.49 |
| 6 | 0.7033±(0.0624)**B** | 0.61 | 0.83 |
| n-HA-EMD-agarose | 2 | 0.254±(0.033)**E** | 0.21 | 0.32 |
| 4 | 0.518±(0.064)**C** | 0.43 | 0.59 |
| 6 | 0.909±(0.053)**A** | 0.83 | 0.99 |

*Statistically significant (significance level p < 0.05), Material×time; interaction between material and time, means with different superscript letters (F, D, B, E, C, A) indicate a significant difference in multiple comparison tests (Tukey's post-hoc test), EMD; enamel matrix derivative, n-HA; nano-hydroxyapatite, SD; standard deviation.
